# Supplementary material
Source: publisher figshare collection journal article supplement (https://acs.figshare.com/ndownloader/files/24635411)
Supplement: Supplementary file 1 [file 24635411]

# Hydrogen Evolution Reaction Activity of Heterogeneous Materials – a Theoretical Model

## Supporting document

*Joakim Ekspong, Eduardo Gracia-Espino\*, Thomas Wågberg\**

Department of Physics, Umeå University, Umeå 90187, Sweden

**Table S1.** Symbols used in the manuscript and their descriptions.

| Symbol                | Description                                                                                           |
|-----------------------|-------------------------------------------------------------------------------------------------------|
| $R1, R2, R3$          | Elementary reaction steps corresponding to Volmer, Heyrovsky, and Tafel reactions                     |
| $\Delta G_H$          | Hydrogen adsorption free energy                                                                       |
| $i_0$                 | Exchange current density                                                                              |
| $\theta_{tot}^*$      | Total equilibrium hydrogen coverage                                                                   |
| $\theta_{tot}$        | Total hydrogen coverage                                                                               |
| $\theta_{totDFT}^*$   | Total equilibrium hydrogen coverage obtained from the DFT model, used to calculate the $\Delta G_H$ . |
| $p_{H_2}$             | Hydrogen pressure                                                                                     |
| $k$                   | Boltzmann constant                                                                                    |
| $T$                   | Temperature                                                                                           |
| $h$                   | Planck constant                                                                                       |
| $\theta_i^*$          | Equilibrium Occupation of adsorption site ( $i$ )                                                     |
| $\theta_i$            | Occupation of adsorption site ( $i$ )                                                                 |
| $N_{sites}$           | Total number of adsorption sites                                                                      |
| $r$                   | Strength factor of the linear dependence of $\Delta G_H$ to the total coverage $\theta_{tot}$         |
| $\vec{v}_i$           | Forward rate of elementary reaction step $i$                                                          |
| $\overleftarrow{v}_i$ | Backward rate of elementary reaction step $i$                                                         |
| $v_i$                 | Net rate of reaction $i$ . ( $\vec{v}_i - \overleftarrow{v}_i$ )                                      |
| $\vec{\Delta G}_i^0$  | Standard free energy of activation of elementary reaction step $i$                                    |

|                         |                                                                            |
|-------------------------|----------------------------------------------------------------------------|
| $\alpha, \beta, \gamma$ | Charge transfer coefficients                                               |
| $\phi$                  | Inner potential (potential between material and solution)                  |
| $\phi^*$                | Equilibrium inner potential                                                |
| $\eta$                  | Overpotential                                                              |
| $e_0$                   | Electron charge                                                            |
| $a_H$                   | Activity of protons in the solution                                        |
| $G1, G2, G3$            | “Magnitude” of the exchange current of the three elementary reaction steps |
| $N_{nb}$                | Number of neighboring sites to site $i$                                    |
| $J_{tot}$               | Total electrical current density                                           |

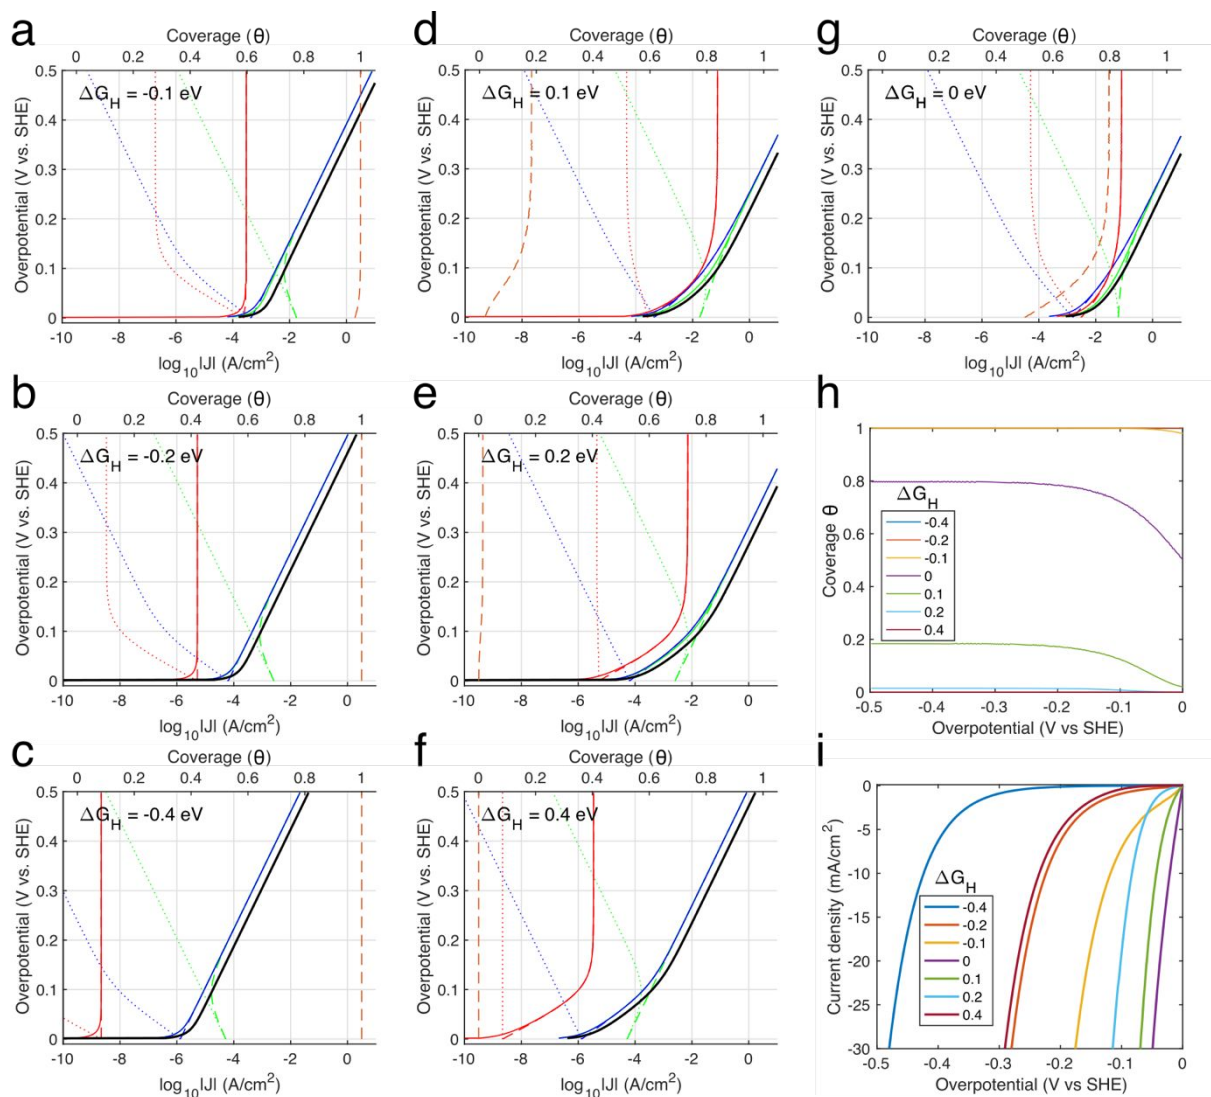

**Figure S1. (a-g)** Theoretical Tafel plots of homogeneous materials considering different values of  $\Delta G_H$ . The  $\Delta G_H$  is varied from -0.4 to 0.4 eV as displayed in each figure. **(h)** The hydrogen coverage against overpotential and **(i)** a voltammetry curves for the same systems are also shown.

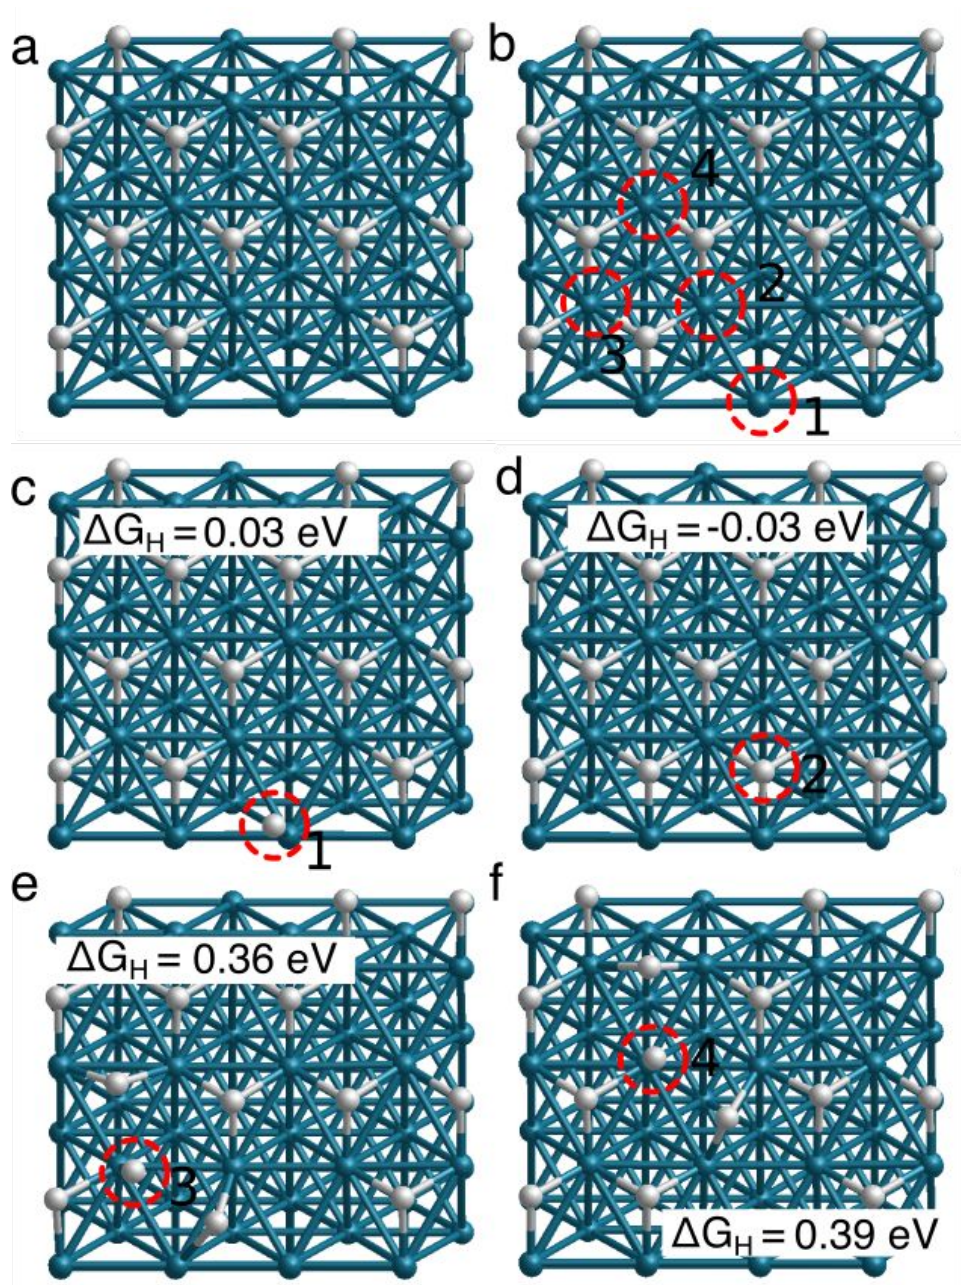

**Figure S2.** (a) Equilibrium H-coverage structure of Pt<sub>111</sub> with a coverage of 0.81 ML with only fcc adsorption sites occupied. (b) Non-equilibrium ontop adsorption sites tested and the final relaxed structures of these are shown in (c-f).

**Table S2.** The hydrogen adsorption free energies for metals at and above the equilibrium hydrogen coverage. Both ontop and 3-fold adsorption sites are tested above the equilibrium coverage. If fcc sites are filled, the 3-fold sites are hcp and vice versa.

| Metal | $\Delta G_H, \theta = \text{eq. (eV)}$ | $\Delta G_H \text{ OT}, \theta > 1 \text{ ML (eV)}$ | $\Delta G_H \text{ 3-fold}, \theta > 1 \text{ ML (eV)}$ |
|-------|----------------------------------------|-----------------------------------------------------|---------------------------------------------------------|
| Pd111 | -0.26                                  | 0.87                                                | 0.57                                                    |
| Pt111 | -0.04                                  | ~ 0.39 eV. 2 NB-H moves to bridges.                 | H moves to bridge. 3 NB-H moves to bridge/OT            |
| Ir111 | -0.05                                  | -                                                   | 0.11                                                    |
| Fe111 | -0.39                                  | 0.75                                                | 0.86                                                    |
| Ni111 | -0.38                                  | 1.03                                                | 0.88                                                    |
| Co111 | -0.47                                  | 0.72                                                | 0.76                                                    |
| Rh111 | -0.16                                  | 0.49                                                | 0.64                                                    |

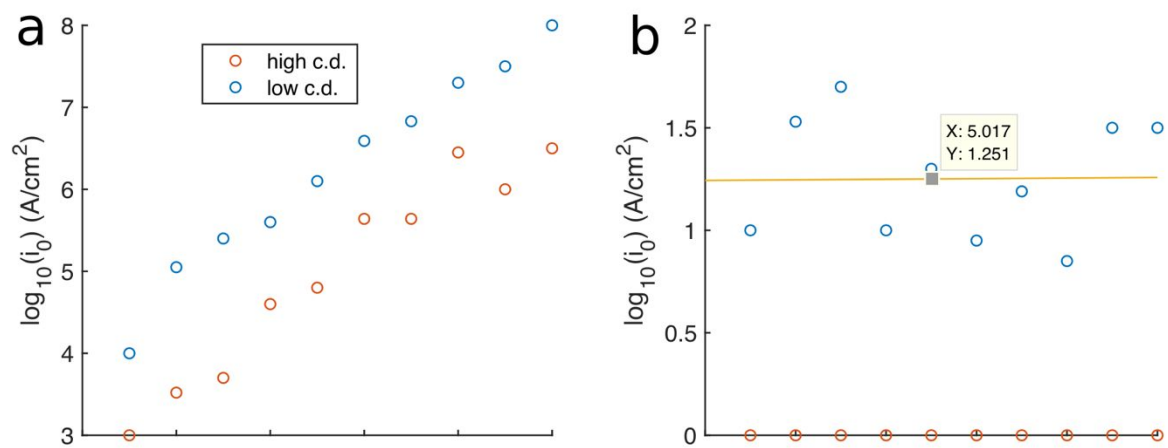

**Figure S3. (a)** Absolute values of experimental exchange current densities obtained from high current density regions (orange) and low current density regions (blue) for several different elements including, Mo, Pt, Au, Ag, Pd, W. **(b)** Here the  $i_0$  are subtracted for each data point showing the difference between high and low obtained  $i_0$ . The mean difference is calculated to 1.25 ( $\log_{10} |A/cm^2|$ ). Experimental data are taken from ref<sup>1-5</sup>.

**Table S3.** Theoretical exchange current densities and overpotentials needed for 10 mA/cm<sup>2</sup> for different MoS<sub>2</sub> configurations with different relative amounts of edge-atoms.

| Percentage of edge-atoms (%) | Exchange current density $\log_{10}(\text{A}/\text{cm}^2)$ | Overpotential at 10 mA/cm <sup>2</sup> (V) |
|------------------------------|------------------------------------------------------------|--------------------------------------------|
| 0                            | -17.41                                                     | 1.64                                       |
| 1                            | -5.34                                                      | 0.26                                       |
| 3                            | -4.86                                                      | 0.21                                       |
| 5                            | -4.64                                                      | 0.18                                       |
| 10                           | -4.34                                                      | 0.15                                       |
| 25                           | -3.94                                                      | 0.11                                       |
| 50                           | -3.64                                                      | 0.09                                       |
| 100                          | -3.34                                                      | 0.07                                       |

## REFERENCES

1. Parsons, R., *Handbook of Electrochemical Constants*. Butterworths: London, 1959.
2. Conway, B. E.; Steacie, E. W. R., Kinetics of electrolytic hydrogen and deuterium evolution. *Proceedings of the Royal Society of London. Series A. Mathematical and Physical Sciences* 1960, 256 (1284), 128-144.
3. Bockris, J. O. M.; Ammar, I. A.; Huq, A. K. M. S., The Mechanism of the Hydrogen Evolution Reaction on Platinum, Silver and Tungsten surfaces in Acid Solutions. *The Journal of Physical Chemistry* 1957, 61 (7), 879-886.
4. Pentland, N.; Bockris, J. O. M.; Sheldon, E., Hydrogen Evolution Reaction on Copper, Gold, Molybdenum, Palladium, Rhodium, and Iron. *Journal of The Electrochemical Society* 1957, 104 (3), 182.

5. Kibler, L. A.; Hermann, J. M.; Abdelrahman, A.; El-Aziz, A. A.; Jacob, T., New insights on hydrogen evolution at Au single crystal electrodes. *Current Opinion in Electrochemistry* 2018, 9, 265-270.
